# Supplementary material
Source: MDPI journal article supplement (https://www.mdpi.com/2079-9292/12/1/198)
Supplement: s1 [file s1]

**Table S1.** Name, number of annotations per class, number of images in which each class occurs, precision, recall, mean average precision at 50% intersect-over-union (IoU) threshold (mAP50) and at 50% to 95% IoU (in 5%-steps, mAP50-95) values per class. Empty fields indicate classes which did not appear in the test set due to the low number of images available in the training set) and the metaclass.

| Class             | Annotations | Total images | Test set instances | Precision | Recall | mAP50   | mAP50-95 | Metaclass         |
|-------------------|-------------|--------------|--------------------|-----------|--------|---------|----------|-------------------|
| Aluminium foil    | 80          | 52           | 14                 | 0.53      | 0.286  | 0.293   | 0.276    | Metal litter      |
| Backpack          | 28          | 15           | 2                  | 0.567     | 1      | 0.995   | 0.895    | Clothing & Fabric |
| Battery           | 3           | 3            |                    |           |        |         |          | N img < 10        |
| Broken glass      | 110         | 14           | 1                  | 1         | 0      | 0.00229 | 0.00206  | Glass             |
| Button            | 1           | 1            | 1                  | 1         | 0      | 0       | 0        | N img < 10        |
| Cardboard         | 326         | 247          | 64                 | 0.449     | 0.382  | 0.424   | 0.369    | Paper & Cardboard |
| Chair             | 19          | 12           | 8                  | 1         | 0.226  | 0.246   | 0.137    | Other             |
| Cigarette         | 1           | 1            |                    |           |        |         |          | N img < 10        |
| Cigarette butt    | 795         | 252          | 205                | 0.612     | 0.278  | 0.347   | 0.238    | Other             |
| Cigarette package | 8           | 4            | 5                  | 1         | 0      | 0.0395  | 0.0356   | N img < 10        |
| Cloth             | 89          | 59           | 18                 | 0.316     | 0.111  | 0.113   | 0.0611   | Clothing & Fabric |
| Cork stopper      | 1           | 1            | 1                  | 1         | 0      | 0       | 0        | N img < 10        |
| Diaper            | 1           | 1            |                    |           |        |         |          | N img < 10        |
| Dog               | 1           | 1            |                    |           |        |         |          | N img < 10        |
| Drink carton      | 59          | 56           | 10                 | 0.208     | 0.3    | 0.135   | 0.109    | Paper & Cardboard |
| Egg carton        | 6           | 5            | 1                  | 1         | 0      | 0.00418 | 0.00418  | N img < 10        |
| Facemask          | 9           | 8            |                    |           |        |         |          | N img < 10        |
| Food waste        | 2           | 2            |                    |           |        |         |          | N img < 10        |
| Garbage bag       | 37          | 25           | 12                 | 0.507     | 0.259  | 0.291   | 0.189    | Plastic           |
| Glass bottle      | 231         | 171          | 59                 | 0.611     | 0.266  | 0.404   | 0.317    | Glass             |
| Glass cup         | 1           | 1            |                    |           |        |         |          | N img < 10        |
| Glass jar         | 10          | 8            | 1                  | 1         | 0      | 0.0151  | 0.00754  | N img < 10        |
| Hair pin          | 1           | 1            |                    |           |        |         |          | N img < 10        |
| Lightbulb         | 8           | 8            | 3                  | 1         | 0      | 0.168   | 0.151    | N img < 10        |
| Lighter           | 24          | 20           | 2                  | 0.759     | 1      | 0.995   | 0.646    | Plastic           |

|                        |      |     |     |       |        |        |         |                   |
|------------------------|------|-----|-----|-------|--------|--------|---------|-------------------|
| Match                  | 1    | 1   |     |       |        |        |         | N img < 10        |
| Metal                  | 35   | 24  | 7   | 0.305 | 0.143  | 0.147  | 0.131   | Metal litter      |
| Metal bottlecap        | 79   | 55  | 18  | 0.445 | 0.167  | 0.135  | 0.115   | Metal litter      |
| Metal can              | 597  | 408 | 108 | 0.695 | 0.633  | 0.627  | 0.516   | Metal litter      |
| Grating                | 91   | 69  | 27  | 0.712 | 0.296  | 0.34   | 0.151   | Other             |
| Metal lid              | 7    | 4   | 2   | 1     | 0      | 0      | 0       | N img < 10        |
| Metal pole             | 12   | 7   | 2   | 0.835 | 1      | 0.995  | 0.796   | N img < 10        |
| Metal screw cap        | 37   | 30  | 8   | 1     | 0      | 0      | 0       | Metal litter      |
| Other plastic          | 1298 | 660 | 258 | 0.359 | 0.244  | 0.238  | 0.168   | Plastic           |
| Paper                  | 478  | 312 | 93  | 0.297 | 0.14   | 0.128  | 0.0978  | Paper & Cardboard |
| Paper bag              | 6    | 6   | 3   | 1     | 0      | 0.0106 | 0.00531 | N img < 10        |
| Paper cup              | 77   | 73  | 14  | 0.316 | 0.286  | 0.216  | 0.194   | Paper & Cardboard |
| Person                 | 90   | 63  | 17  | 0.766 | 0.577  | 0.667  | 0.499   | Other             |
| Pipe                   | 84   | 57  | 21  | 0.596 | 0.19   | 0.187  | 0.151   | Other             |
| Plant pot              | 3    | 3   | 1   | 1     | 0      | 0      | 0       | N img < 10        |
| Plastic bag            | 90   | 82  | 22  | 0.117 | 0.0909 | 0.116  | 0.0653  | Plastic           |
| Plastic bottle         | 1424 | 906 | 301 | 0.751 | 0.767  | 0.797  | 0.674   | Plastic           |
| Plastic bottlecap      | 941  | 640 | 207 | 0.709 | 0.662  | 0.697  | 0.483   | Plastic           |
| Clothes pin            | 10   | 10  | 2   | 1     | 0      | 0      | 0       | Plastic           |
| Plastic container      | 235  | 190 | 50  | 0.567 | 0.48   | 0.511  | 0.447   | Plastic           |
| Plastic cup            | 135  | 118 | 34  | 0.649 | 0.219  | 0.367  | 0.288   | Plastic           |
| Plastic floater        | 3    | 2   |     |       |        |        |         | N img < 10        |
| Plastic lid            | 68   | 64  | 15  | 0.199 | 0.2    | 0.124  | 0.106   | Plastic           |
| Plastic utensils       | 58   | 50  | 15  | 0.43  | 0.267  | 0.259  | 0.235   | Plastic           |
| Plastic wrapper & foil | 1230 | 717 | 249 | 0.399 | 0.357  | 0.289  | 0.226   | Plastic           |
| Pop tab                | 170  | 128 | 43  | 0.777 | 0.488  | 0.499  | 0.366   | Metal litter      |
| QTip                   | 1    | 1   | 1   | 1     | 0      | 0      | 0       | N img < 10        |
| Rope & string          | 223  | 167 | 45  | 0.737 | 0.436  | 0.477  | 0.337   | Other             |
| Scrap metal            | 46   | 18  | 8   | 1     | 0      | 0      | 0       | Metal litter      |
| Shoe                   | 156  | 105 | 30  | 0.626 | 0.467  | 0.528  | 0.43    | Clothing & Fabric |
| Soccer ball            | 1    | 1   |     |       |        |        |         | N img < 10        |

|             |     |     |     |       |       |       |       |                      |
|-------------|-----|-----|-----|-------|-------|-------|-------|----------------------|
| Spark plug  | 2   | 2   |     |       |       |       |       | N img < 10           |
| Squeezetube | 4   | 4   |     |       |       |       |       | N img < 10           |
| Straws      | 213 | 159 | 63  | 0.463 | 0.127 | 0.141 | 0.101 | Plastic              |
| Styrofoam   | 98  | 79  | 22  | 0.629 | 0.227 | 0.343 | 0.294 | Plastic              |
| Table       | 3   | 1   | 3   | 1     | 0     | 0     | 0     | N img < 10           |
| Tennis ball | 1   | 1   |     |       |       |       |       | N img < 10           |
| Tile        | 19  | 5   | 3   | 0.235 | 0.333 | 0.168 | 0.168 | N img < 10           |
| Tissue      | 103 | 65  | 32  | 0.712 | 0.465 | 0.537 | 0.48  | Paper &<br>Cardboard |
| Tooth brush | 1   | 1   |     |       |       |       |       | N img < 10           |
| Tyre        | 115 | 55  | 25  | 0.785 | 0.72  | 0.762 | 0.586 | Other                |
| Wood        | 515 | 238 | 141 | 0.669 | 0.369 | 0.448 | 0.324 | Other                |

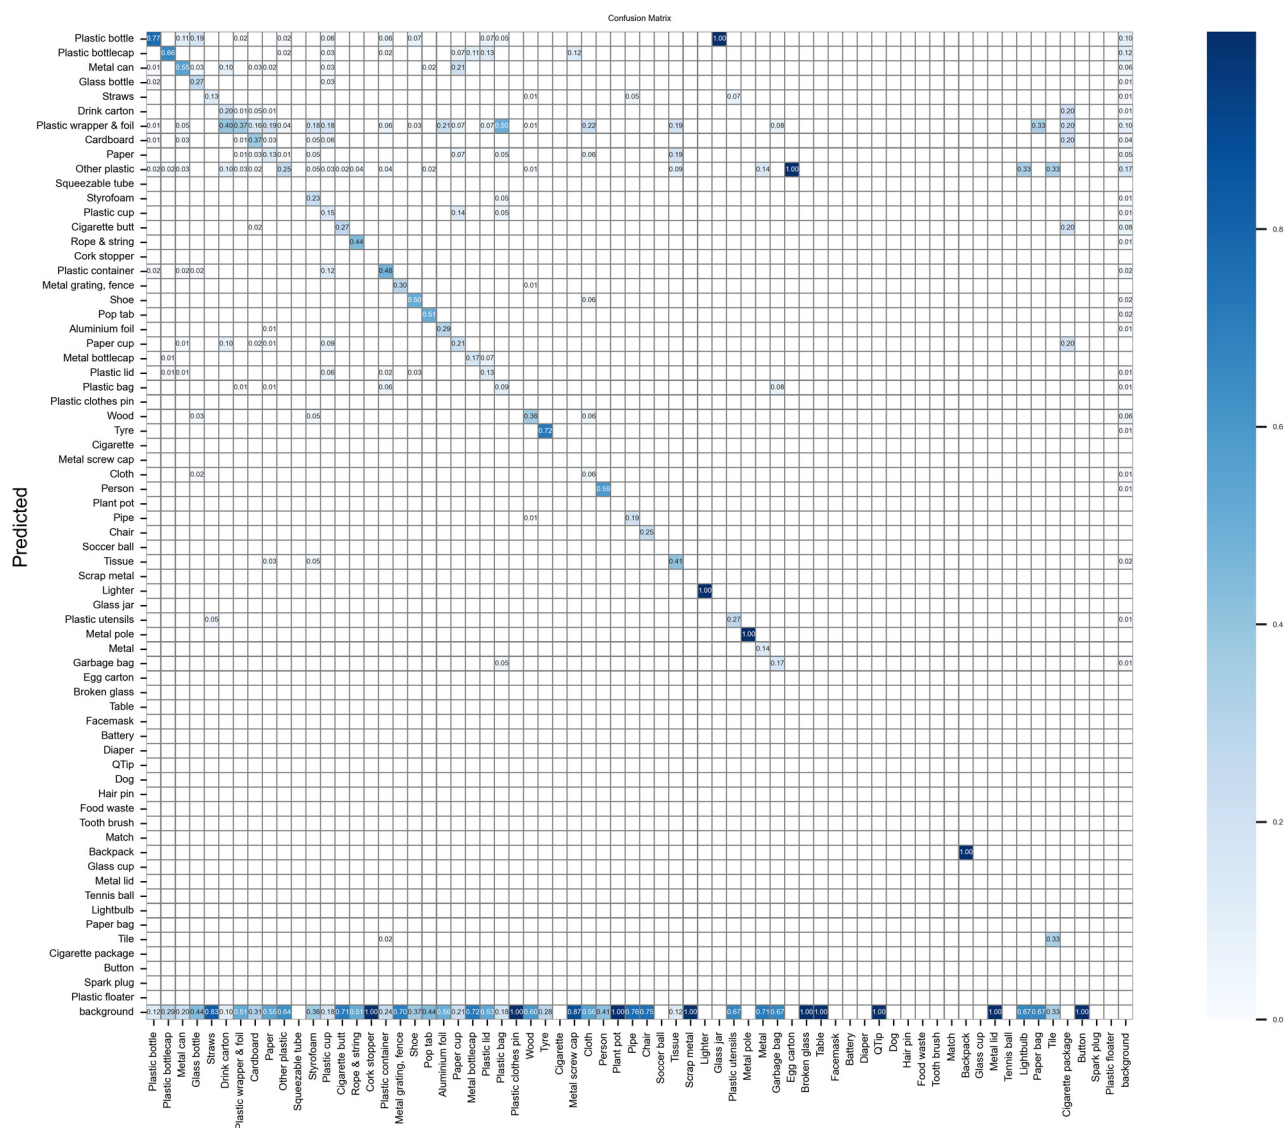

**Figure S1.** Confusion matrix from the validation against the test set. The x-axis represents the actual categories of objects, while the y-axis represents the categories of the detections as predicted by the algorithm. Values in the matrix represent the proportion of predictions for detections of each category. Perfect predictions with no misclassifications will lead to a single line of 1.0 values running across the matrix from the top left to the bottom right. The fact that many misclassifications have been predicted as “background” and are therefore accumulating at the bottom of the matrix indicates false negative (FN) predictions (i.e., missed objects that should have been detected).
